# Supplementary material
Source: PubMed Central journal article supplement (PMC5875350)
Supplement: jamapediatr-172-345-s001.pdf [file jamapediatr-172-345-s001.pdf]

## Supplementary Online Content

MacMillan KDL, Rendon CP, Verma K, Riblet N, Washer DB, Holmes AV. Association of rooming-in with outcomes for neonatal abstinence syndrome: a systematic review and meta-analysis. *JAMA Pediatr*. Published online February 5, 2018. doi:10.1001/jamapediatrics.2017.5195

**eMethods.** Supplemental Methods

**eTable 1.** Risk of Bias Assessments for Included Studies

**eTable 2.** Cost of Hospital Stay for Infants With NAS

**eTable 3.** Qualitative Assessment of Readmissions Rates for Infants With NAS

**eTable 4.** Qualitative Assessment of Breastfeeding Rates for Infants With NAS

**eTable 5.** Qualitative Assessment of Rate of Discharge Home With Mother for Infants With NAS

This supplementary material has been provided by the authors to give readers additional information about their work.

## eMethods. Supplemental Methods

### Inclusion Criteria & Outcomes of Interest

| Category              | Inclusion Criteria                                                                                                                                                                                                                                                                                            | Justification                                                                                                                                                                                                                                                                                                                                                                                                                                                                                                                                                                             | Order |
|-----------------------|---------------------------------------------------------------------------------------------------------------------------------------------------------------------------------------------------------------------------------------------------------------------------------------------------------------|-------------------------------------------------------------------------------------------------------------------------------------------------------------------------------------------------------------------------------------------------------------------------------------------------------------------------------------------------------------------------------------------------------------------------------------------------------------------------------------------------------------------------------------------------------------------------------------------|-------|
| Study Design          | Any of the following study types: Randomized Control Trials, Prospective and Retrospective Cohort Studies, Quasi-experimental designs, Before-After Quality Improvement Studies                                                                                                                               | Both because of the complex nature of the condition and intervention of interest, and limited available funding, and rapidly increasing incidence, we expect much of the work to be done as observational studies and QI initiatives                                                                                                                                                                                                                                                                                                                                                      | 1     |
| Population            | Infants with intrauterine opioid exposure                                                                                                                                                                                                                                                                     | This is the population at risk for Neonatal Abstinence Syndrome <sup>1,2</sup> . Infants with known substance use exposure are included, exposure to the following is considered but not limited to: heroin, prescription opioids, non-prescription opiates, opiate-replacement therapy, and poly-substance abuse that include at least one opioid.                                                                                                                                                                                                                                       | 2     |
| Condition of Interest | Infants identified as needing observation or undergoing treatment for Neonatal Abstinence Syndrome                                                                                                                                                                                                            | This is the condition that results in needing monitoring of NAS symptoms and treatment of NAS if necessary <sup>1,2</sup> .                                                                                                                                                                                                                                                                                                                                                                                                                                                               | 3     |
| Intervention          | Rooming In:<br>During newborn admission, infant and mother are allowed to stay together 24 hours a day unless separation is indicated for justifiable medical needs other than NAS symptoms. There may be other co-interventions, such as increased skin-to-skin, swaddling, soothing, breastfeeding support. | This is a family-centered environmental intervention where rooming in is the term applied to this approach to care as defined by the Baby-Friendly Hospital Initiative <sup>3</sup> . Co-interventions listed may be considered non-pharmacologic management of NAS symptoms will be allowable because given that the intervention of rooming-in for NAS is fairly recent, it may be impossible to find sufficient studies if excluded <sup>2,4</sup> . Additionally, allowing greater parental involvement in soothing and other nonpharmacologic treatments forms the primary plausible | 4     |

|                  |                                                                                                                                                                                                                                                   |                                                                                                                                                                                                                                                                                                  |   |
|------------------|---------------------------------------------------------------------------------------------------------------------------------------------------------------------------------------------------------------------------------------------------|--------------------------------------------------------------------------------------------------------------------------------------------------------------------------------------------------------------------------------------------------------------------------------------------------|---|
|                  |                                                                                                                                                                                                                                                   | <p>mechanism for the efficacy of rooming-in.</p> <p>NAS scores are not an outcome of interest as different centers use different scoring methods; however, scoring should be consistent within each hospital.</p>                                                                                |   |
| Comparison group | <p>Newborns who received usual care but did not share a room with families. May or may not include other non-pharmacologic-interventions such as soothing, swaddling, breastfeeding promotion, keeping room quiet and avoiding bright lights.</p> | <p>These are infants in the same population with the condition of interest that did not receive the intervention, but were instead in a monitored nursery where parents “visit”. Co-interventions listed would be difficult and perhaps unethical to withhold</p>                                | 5 |
| Outcome          | <p>One of the following -<br/> Reduction of any use of pharmacotherapy,<br/> breastfeeding, reduction of NAS symptom scores,<br/> length of stay, cost of stay,<br/> patient-family satisfaction scores</p>                                       | <p>These include our primary and secondary positive outcomes of interest which might be expected to be impacted by the intervention of rooming-in<sup>1,2</sup>. We plan to include studies that address any of these outcomes to avoid an overly narrow search in a relatively small field.</p> | 6 |

## Search strategies

### Electronic bibliographic database searches

| Queries in PubMed |                                                                                                                                                                                                                                                                                                                              |             |
|-------------------|------------------------------------------------------------------------------------------------------------------------------------------------------------------------------------------------------------------------------------------------------------------------------------------------------------------------------|-------------|
| Search            | Query                                                                                                                                                                                                                                                                                                                        | Items found |
| #1                | Search "Neonatal Abstinence Syndrome"[Mesh] or "neonatal abstinence syndrome"[TIAB] or "neonatal passive addiction"[TIAB] or maternal opioid[TIAB] or maternal substance[TIAB] or opioid dependent mothers[TIAB] or in utero substance exposure[TIAB] or prenatal substance exposure [TIAB]                                  | 1,989       |
| #2                | Search (((("Rooming-in Care"[Mesh]) OR "Breast Feeding"[Mesh]) OR "Infant Care"[Mesh]) OR "Postnatal Care"[Mesh]) OR "Patients' Rooms"[Mesh] or room*[TIAB] or breast feeding[TIAB] or breastfeeding[TIAB] or patient centered care[TIAB] or family centered care[TIAB] or nonpharmacologic[TIAB] or non pharmacologic[TIAB] | 203,375     |
| #3                | Search #1 and #2                                                                                                                                                                                                                                                                                                             | 216         |

| Queries in Cochrane Library |                                                                                                                                                                                                                          |             |
|-----------------------------|--------------------------------------------------------------------------------------------------------------------------------------------------------------------------------------------------------------------------|-------------|
| Search                      | Query                                                                                                                                                                                                                    | Items found |
| #1                          | "Neonatal abstinence syndrome"                                                                                                                                                                                           | 124         |
| #2                          | "Rooming in or rooming in care or infant care or postnatal care or patients room or room* or breastfeed* or breast feed* or patient centered care or family centered care or nonpharmacologic care or non pharmacologic" | 28827       |
| #3                          | Search #1 and #2                                                                                                                                                                                                         | 42          |

| <b>Queries in CINAHL</b> |                                                                                                                                                                                                                          |                    |
|--------------------------|--------------------------------------------------------------------------------------------------------------------------------------------------------------------------------------------------------------------------|--------------------|
| <b>Search</b>            | <b>Query</b>                                                                                                                                                                                                             | <b>Items found</b> |
| #1                       | "neonatal abstinence syndrome"                                                                                                                                                                                           | 543                |
| #2                       | "Rooming in or rooming in care or infant care or postnatal care or patients room or room* or breastfeed* or breast feed* or patient centered care or family centered care or nonpharmacologic care or non pharmacologic" | 105,732            |
| #3                       | Search #1 and #2                                                                                                                                                                                                         | 224                |

**Electronic trial registry database search**

| <b>Queries in Clinicaltrials.gov</b> |                                                  |                    |
|--------------------------------------|--------------------------------------------------|--------------------|
| <b>Search</b>                        | <b>Query</b>                                     | <b>Items found</b> |
| #1                                   | Search Condition: "Neonatal Abstinence Syndrome" | 36                 |
| #2                                   | Search Intervention: "Rooming-in"                | 2                  |
| #3                                   | Search #1 and #2                                 | 0                  |

**Author contact with NAS expertise**

|                          |                                                                                                             |
|--------------------------|-------------------------------------------------------------------------------------------------------------|
| <b>Expert</b>            | Dr. Alison Holmes, MD, MPH, MS                                                                              |
| <b>Title/Affiliation</b> | Pediatric Hospitalist, Associate Professor of Pediatrics at Geisel School of Medicine at Dartmouth          |
| <b>Date of contact</b>   | 8/31/16                                                                                                     |
| <b>Results</b>           | Alerted us to pre-publication study and put in contact with Primary Investigator, Dr. Matthew Grossman, MD. |

**eTable 1.** Risk of Bias Assessments for Included Studies

| <b>Study</b>                 | <b>Confounding</b> | <b>Selection of participants</b> | <b>Classification of interventions</b> | <b>Departure from intended interventions</b> | <b>Missing data</b> | <b>Measurement of outcomes</b> | <b>Selection of reported data</b> | <b>Other sources of bias</b> |
|------------------------------|--------------------|----------------------------------|----------------------------------------|----------------------------------------------|---------------------|--------------------------------|-----------------------------------|------------------------------|
| Abrahams, 2007 <sup>5</sup>  | <i>Low</i>         | <i>Low</i>                       | <i>Low</i>                             | <i>Low</i>                                   | <i>Low</i>          | <i>Low</i>                     | <i>Low</i>                        | <i>Unclear</i>               |
| Holmes, 2016 <sup>6</sup>    | <i>Unclear</i>     | <i>Low</i>                       | <i>Low</i>                             | <i>High</i>                                  | <i>Low</i>          | <i>Low</i>                     | <i>Low</i>                        | <i>None</i>                  |
| Hünsleler, 2013 <sup>7</sup> | <i>Low</i>         | <i>High</i>                      | <i>Low</i>                             | <i>Low</i>                                   | <i>Low</i>          | <i>Low</i>                     | <i>Low</i>                        | <i>None</i>                  |
| Grossman, 2017 <sup>8</sup>  | <i>Low</i>         | <i>Unclear</i>                   | <i>Low</i>                             | <i>High</i>                                  | <i>Low</i>          | <i>Low</i>                     | <i>Low</i>                        | <i>None</i>                  |
| McKnight, 2016 <sup>9</sup>  | <i>Low</i>         | <i>Low</i>                       | <i>Low</i>                             | <i>Low</i>                                   | <i>Low</i>          | <i>Low</i>                     | <i>Low</i>                        | <i>None</i>                  |
| Saiki, 2010 <sup>10</sup>    | <i>Low</i>         | <i>Low</i>                       | <i>Low</i>                             | <i>Low</i>                                   | <i>Low</i>          | <i>Low</i>                     | <i>Low</i>                        | <i>None</i>                  |

Low = Low risk of bias, High = High risk of bias, Unclear = Unclear risk of bias. *Based on ROBINS-I Risk of Bias assessment tool for non-randomized interventions.*<sup>16</sup>

**eTable 2. Cost of Hospital Stay for Infants With NAS**

| Author (year)               | Total sample size | RI Mean (SD)   | CG Mean (SD)    | Standard mean difference (95% CI) | Study arm favored (RI or CG) | Is difference statistically significant? |
|-----------------------------|-------------------|----------------|-----------------|-----------------------------------|------------------------------|------------------------------------------|
| Grossman, 2017 <sup>8</sup> | 99                | 10,289 (5,068) | 44,824 (23,726) | -1.90 (-2.38, -1.42)              | RI                           | Yes                                      |
| Holmes, 2016 <sup>6</sup>   | 163               | 5,327 (3,627)  | 11,006 (9,628)  | -0.76 (-1.16, -0.35)              | RI                           | Yes                                      |
| Hünseler, 2013 <sup>7</sup> | 77                | 14,203 (7,096) | 19,166 (8,061)  | -0.63 (-1.12, -0.14)              | RI                           | Yes                                      |

**Qualitative summary:**

All three studies demonstrated a statistically significant reduction in cost of stay for infants with NAS. There was significant heterogeneity across the three studies ( $I^2=97\%$ ), which precluded formal meta-analysis.

RI=Rooming-In, CG=Comparison Group; CI=confidence interval, SD=standard deviation.

**eTable 3.** Qualitative Assessment of Readmissions Rates for Infants With NAS

| Author (year)                | Total sample size | Outcome measure reported                        | RI Rate # (%) | CG Rate # (%) | Difference between groups RR (95% CI; p-value) | Study arm favored (RI or CG) | Is difference statistically significant? |
|------------------------------|-------------------|-------------------------------------------------|---------------|---------------|------------------------------------------------|------------------------------|------------------------------------------|
| Abrahams (2007) <sup>5</sup> | 106               | Readmission for symptoms of NAS within 6 months | 0/32 (0)      | NR            | NR                                             | RI                           | N/A                                      |
| Holmes (2016) <sup>6</sup>   | 163               | All-cause readmission within 30 days            | 7/109 (6.2)   | 2/54 (3.7)    | 1.7 (0.4-8.1; 0.46)                            | CG                           | No                                       |
| Saiki (2010) <sup>10</sup>   | 60                | All-cause readmission within 2 months           | 0/18 (0)      | 0/42 (0)      | 0                                              | Neither                      | No                                       |

**Qualitative summary:** None of the three studies reviewed which followed infants for hospital readmission reported a statistically significant increase in readmission for infants who roomed-in with their mothers.

RI=Rooming-In, CG=Comparison Group; RR=Risk ratio



**eTable 4.** Qualitative Assessment of Breastfeeding Rates for Infants With NAS

| Author (year)                | Total sample size | Outcome measure reported                                  | RI Rate # (%) | CG Rate # (%) | Difference between groups RR (95% CI; p-value) | Study arm favored (RI or CG) | Is difference statistically significant? |
|------------------------------|-------------------|-----------------------------------------------------------|---------------|---------------|------------------------------------------------|------------------------------|------------------------------------------|
| Abrahams (2007) <sup>5</sup> | 106               | Any breastfeeding                                         | 20/32 (62.5)  | 7/74 (9.5)    | 6.6 (3.1-14.0; <0.0001)                        | RI                           | Yes                                      |
| Grossman (2017) <sup>8</sup> | 99                | Breastfeeding at discharge                                | 20/44 (45.5)  | 11/55 (20.0)  | 2.3 (1.2-4.2; 0.0094)                          | RI                           | Yes                                      |
| McKnight (2016) <sup>9</sup> | 44                | Any breastfeeding                                         | 14/20 (70.0)  | 12/24 (50.0)  | 1.4 (0.9-2.3; 0.18)                            | RI                           | No                                       |
| Saiki (2010) <sup>10</sup>   | 60                | Breastfeeding with or without complementary formula feeds | 8/18 (44.4)   | 17/42 (40.5)  | 1.1 (0.6-2.1; 0.77)                            | RI                           | No                                       |

**Qualitative summary:** One study reported a statistically significant increase in breastfeeding at discharge for infants who roomed-in with their mothers. The three remaining studies reported any breastfeeding during hospital stay, with one study demonstrating a statistically significant increase in any breastfeeding and two studies showing no statistically significant difference in breastfeeding rates between study groups.

RI=Rooming-In, CG=Comparison Group; RR=Risk ratio

**eTable 5.** Qualitative Assessment of Rate of Discharge Home With Mother for Infants With NAS

| Author (year)                | Total sample size | Outcome measure reported        | RI Rate # (%) | CG Rate # (%) | Difference between groups RR (95% CI; p-value) | Study arm favored (RI or CG) | Is difference statistically significant? |
|------------------------------|-------------------|---------------------------------|---------------|---------------|------------------------------------------------|------------------------------|------------------------------------------|
| Abrahams (2007) <sup>5</sup> | 106               | Discharged in custody of mother | 23/32 (71.9)  | 29/74 (39.2)  | 1.8 (1.3-2.6; 0.0009)                          | RI                           | Yes                                      |
| Holmes (2016) <sup>6</sup>   | 102               | Discharged in parental care     | 43/48 (89.6)  | 50/54 (92.6)  | 0.97 (0.9-1.1; 0.60)                           | CG                           | No                                       |
| Hünseler (2013) <sup>7</sup> | 77                | Discharged into family          | 19/24 (79.2)  | 37/53 (69.8)  | 1.1 (0.9-1.5; 0.36)                            | RI                           | No                                       |
| Saiki (2010) <sup>10</sup>   | 60                | Discharged with mother          | 13/18 (72.2)  | 25/42 (59.5)  | 1.2 (0.8-1.8; 0.32)                            | RI                           | No                                       |

**Qualitative summary:** One of the four studies reported a significant increase in proportion of infants discharged home with mother among the rooming-in group. The remaining three studies all reported relatively high rates of discharge home with family, with no statistically significant difference in rates between study groups.

RI=Rooming-In, CG=Comparison Group; RR=Risk ratio

## References

1. Jones HE, Fielder A. Neonatal abstinence syndrome: Historical perspective, current focus, future directions. *Preventive medicine*. 2015;80:12-17.
2. McQueen K, Murphy-Oikonen J. Neonatal abstinence syndrome. *New England Journal of Medicine*. 2016;375(25):2468-2479.
3. Organization WH, Unicef. Baby-friendly hospital initiative: revised, updated and expanded for integrated care. 2009.
4. Edwards L, Brown LF. Nonpharmacologic management of neonatal abstinence syndrome: an integrative review. *Neonatal Network*. 2016;35(5):305-313.
5. Abrahams RR, Kelly SA, Payne S, Thiessen PN, Mackintosh J, Janssen PA. Rooming-in compared with standard care for newborns of mothers using methadone or heroin. *Canadian Family Physician*. 2007;53(10):1722-1730.
6. Holmes AV, Atwood EC, Whalen B, et al. Rooming-in to treat neonatal abstinence syndrome: improved family-centered care at lower cost. *Pediatrics*. 2016;137(6):e20152929.
7. Hünseler C, Brückle M, Roth B, Kribs A. Neonatal opiate withdrawal and rooming-in: a retrospective analysis of a single center experience. *Klinische Pädiatrie*. 2013;225(05):247-251.
8. Grossman MR, Berkwitz AK, Osborn RR, et al. An Initiative to Improve the Quality of Care of Infants With Neonatal Abstinence Syndrome. *Pediatrics*. 2017;139(6):e20163360.
9. McKnight S, Coe H, Davies G, et al. Rooming-in for infants at risk of neonatal abstinence syndrome. *American journal of perinatology*. 2016;33(05):495-501.
10. Saiki T, Lee S, Hannam S, Greenough A. Neonatal abstinence syndrome—postnatal ward versus neonatal unit management. *European journal of pediatrics*. 2010;169(1):95.
